# Supplementary material for: Control of Treg and TH17 cell differentiation by the aryl hydrocarbon receptor
Source: Springer Nature journal article supplement (doi:10.1038/nature06880), 2008-03-23
Supplement: 41586_2008_BFnature06880_MOESM242_ESM.pdf [file 41586_2008_BFnature06880_MOESM242_ESM.pdf]

## SUPPLEMENTARY INFORMATION

Supplementary Table 1:

| <b>Treatment</b>                   | <b>Incidence</b> | <b>Mean day of onset<br/>(mean <math>\pm</math> SD)</b> | <b>Mean maximum<br/>score (mean <math>\pm</math> SD)</b> |
|------------------------------------|------------------|---------------------------------------------------------|----------------------------------------------------------|
| <b>Control</b>                     | 42 of 49 (87 %)  | 13.6 $\pm$ 2.8                                          | 2.4 $\pm$ 1.4                                            |
| <b>TCDD 1 <math>\mu</math>g</b>    | 4 of 40 (10 %)*  | 21.8 $\pm$ 1.5*                                         | 0.2 $\pm$ 0.6*                                           |
| <b>TCDD 0.1 <math>\mu</math>g</b>  | 5 of 5 (100 %)   | 17.0 $\pm$ 1.2                                          | 3.1 $\pm$ 0.5                                            |
| <b>TCDD 0.01 <math>\mu</math>g</b> | 7 of 7 (100 %)   | 14.1 $\pm$ 2.9                                          | 2.7 $\pm$ 0.6                                            |

Mice treated with corn oil (Control) or TCDD (1, 0.1 or 0.01  $\mu$ g/mouse) were immunized with MOG<sub>35-55</sub> peptide in CFA and monitored for EAE development. Statistical analysis was performed by comparing groups using one-way analysis of variance.

\*  $P < 0.0001$  vs group control, TCDD 0.01, TCDD 0.1  $\mu$ g and TCDD 0.01  $\mu$ g.

Supplementary Table 2:

| <b>Treatment</b>  | <b>Incidence</b>            | <b>Mean day of onset<br/>(mean <math>\pm</math> SD)</b> | <b>Mean maximum<br/>score (mean <math>\pm</math> SD)</b> |
|-------------------|-----------------------------|---------------------------------------------------------|----------------------------------------------------------|
| <b>WT Control</b> | 12 of 14 (86 %)             | 13.9 $\pm$ 1.9                                          | 2.4 $\pm$ 1.4                                            |
| <b>AHR-d TCDD</b> | 9 of 11 (82 %)              | 17.3 $\pm$ 3.0 <sup>†</sup>                             | 2.2 $\pm$ 1.4                                            |
| <b>WT TCDD</b>    | 1 of 10 (10 %) <sup>#</sup> | 21                                                      | 0.2 $\pm$ 0.6*                                           |

C57BL/6 (WT) and AHR-d mice treated with corn oil (control) or TCDD (1  $\mu$ g/mouse), immunized with MOG<sub>35-55</sub> peptide in CFA and monitored for EAE development. Statistical analysis was performed by comparing groups using one-way analysis of variance.

\*  $P < 0.001$  vs WT Control group and  $P < 0.01$  vs AHR-d TCDD group.

<sup>†</sup>  $P = 0.0046$  vs WT Control group.

<sup>#</sup>  $P = 0.0005$  vs WT Control group  $P = 0.0019$  vs AHR-d TCDD group.



|                                                                     |                                                                     |                                               |
|---------------------------------------------------------------------|---------------------------------------------------------------------|-----------------------------------------------|
|                                                                     | 70 kDa Heat Shock Protein peptide aa 376–395                        | Biopolymers Facility / Harvard Medical School |
|                                                                     | 70 kDa Heat Shock Protein peptide aa 391–410                        | Biopolymers Facility / Harvard Medical School |
|                                                                     | 70 kDa Heat Shock Protein peptide aa 406–425                        | Biopolymers Facility / Harvard Medical School |
|                                                                     | 70 kDa Heat Shock Protein peptide aa 421–440                        | Biopolymers Facility / Harvard Medical School |
|                                                                     | 70 kDa Heat Shock Protein peptide aa 436–455                        | Biopolymers Facility / Harvard Medical School |
|                                                                     | 70 kDa Heat Shock Protein peptide aa 451–470                        | Biopolymers Facility / Harvard Medical School |
|                                                                     | 70 kDa Heat Shock Protein peptide aa 466–485                        | Biopolymers Facility / Harvard Medical School |
|                                                                     | 70 kDa Heat Shock Protein peptide aa 46–65                          | Biopolymers Facility / Harvard Medical School |
|                                                                     | 70 kDa Heat Shock Protein peptide aa 481–500                        | Biopolymers Facility / Harvard Medical School |
|                                                                     | 70 kDa Heat Shock Protein peptide aa 496–515                        | Biopolymers Facility / Harvard Medical School |
|                                                                     | 70 kDa Heat Shock Protein peptide aa 511–530                        | Biopolymers Facility / Harvard Medical School |
|                                                                     | 70 kDa Heat Shock Protein peptide aa 526–545                        | Biopolymers Facility / Harvard Medical School |
|                                                                     | 70 kDa Heat Shock Protein peptide aa 541–560                        | Biopolymers Facility / Harvard Medical School |
|                                                                     | 70 kDa Heat Shock Protein peptide aa 556–575                        | Biopolymers Facility / Harvard Medical School |
|                                                                     | 70 kDa Heat Shock Protein peptide aa 571–590                        | Biopolymers Facility / Harvard Medical School |
|                                                                     | 70 kDa Heat Shock Protein peptide aa 586–605                        | Biopolymers Facility / Harvard Medical School |
|                                                                     | 70 kDa Heat Shock Protein peptide aa 601–620                        | Biopolymers Facility / Harvard Medical School |
|                                                                     | 70 kDa Heat Shock Protein peptide aa 616–635                        | Biopolymers Facility / Harvard Medical School |
|                                                                     | 70 kDa Heat Shock Protein peptide aa 61–80                          | Biopolymers Facility / Harvard Medical School |
|                                                                     | 70 kDa Heat Shock Protein peptide aa 631–640                        | Biopolymers Facility / Harvard Medical School |
|                                                                     | 70 kDa Heat Shock Protein peptide aa 76–95                          | Biopolymers Facility / Harvard Medical School |
|                                                                     | 70 kDa Heat Shock Protein peptide aa 91–110                         | Biopolymers Facility / Harvard Medical School |
|                                                                     | 71 kDa Heat Shock Protein M. tuberculosis                           | Biopolymers Facility / Harvard Medical School |
|                                                                     | 90 kDa Heat Shock Protein                                           | Stressgen                                     |
|                                                                     | GroEL                                                               | Stressgen                                     |
| CNS                                                                 | 2',3'-cyclic nucleotide 3'-phosphodiesterase peptide aa106-125      | Biopolymers Facility / Harvard Medical School |
|                                                                     | 2',3'-cyclic nucleotide 3'-phosphodiesterase peptide aa1-20         | Biopolymers Facility / Harvard Medical School |
|                                                                     | 2',3'-cyclic nucleotide 3'-phosphodiesterase peptide aa121-140      | Biopolymers Facility / Harvard Medical School |
|                                                                     | 2',3'-cyclic nucleotide 3'-phosphodiesterase peptide aa136-155      | Biopolymers Facility / Harvard Medical School |
|                                                                     | 2',3'-cyclic nucleotide 3'-phosphodiesterase peptide aa151-170      | Biopolymers Facility / Harvard Medical School |
|                                                                     | 2',3'-cyclic nucleotide 3'-phosphodiesterase peptide aa16-35        | Biopolymers Facility / Harvard Medical School |
|                                                                     | 2',3'-cyclic nucleotide 3'-phosphodiesterase peptide aa166-185      | Biopolymers Facility / Harvard Medical School |
|                                                                     | 2',3'-cyclic nucleotide 3'-phosphodiesterase peptide aa181-200      | Biopolymers Facility / Harvard Medical School |
|                                                                     | 2',3'-cyclic nucleotide 3'-phosphodiesterase peptide aa196-215      | Biopolymers Facility / Harvard Medical School |
|                                                                     | 2',3'-cyclic nucleotide 3'-phosphodiesterase peptide aa211-230      | Biopolymers Facility / Harvard Medical School |
|                                                                     | 2',3'-cyclic nucleotide 3'-phosphodiesterase peptide aa226-245      | Biopolymers Facility / Harvard Medical School |
|                                                                     | 2',3'-cyclic nucleotide 3'-phosphodiesterase peptide aa241-260      | Biopolymers Facility / Harvard Medical School |
|                                                                     | 2',3'-cyclic nucleotide 3'-phosphodiesterase peptide aa256-275      | Biopolymers Facility / Harvard Medical School |
|                                                                     | 2',3'-cyclic nucleotide 3'-phosphodiesterase peptide aa271-290      | Biopolymers Facility / Harvard Medical School |
|                                                                     | 2',3'-cyclic nucleotide 3'-phosphodiesterase peptide aa286-305      | Biopolymers Facility / Harvard Medical School |
|                                                                     | 2',3'-cyclic nucleotide 3'-phosphodiesterase peptide aa301-320      | Biopolymers Facility / Harvard Medical School |
|                                                                     | 2',3'-cyclic nucleotide 3'-phosphodiesterase peptide aa31-50        | Biopolymers Facility / Harvard Medical School |
|                                                                     | 2',3'-cyclic nucleotide 3'-phosphodiesterase peptide aa316-335      | Biopolymers Facility / Harvard Medical School |
|                                                                     | 2',3'-cyclic nucleotide 3'-phosphodiesterase peptide aa331-350      | Biopolymers Facility / Harvard Medical School |
|                                                                     | 2',3'-cyclic nucleotide 3'-phosphodiesterase peptide aa346-365      | Biopolymers Facility / Harvard Medical School |
|                                                                     | 2',3'-cyclic nucleotide 3'-phosphodiesterase peptide aa361-380      | Biopolymers Facility / Harvard Medical School |
|                                                                     | 2',3'-cyclic nucleotide 3'-phosphodiesterase peptide aa376-395      | Biopolymers Facility / Harvard Medical School |
|                                                                     | 2',3'-cyclic nucleotide 3'-phosphodiesterase peptide aa391-410      | Biopolymers Facility / Harvard Medical School |
|                                                                     | 2',3'-cyclic nucleotide 3'-phosphodiesterase peptide aa406-421      | Biopolymers Facility / Harvard Medical School |
|                                                                     | 2',3'-cyclic nucleotide 3'-phosphodiesterase peptide aa46-65        | Biopolymers Facility / Harvard Medical School |
|                                                                     | 2',3'-cyclic nucleotide 3'-phosphodiesterase peptide aa61-80        | Biopolymers Facility / Harvard Medical School |
|                                                                     | 2',3'-cyclic nucleotide 3'-phosphodiesterase peptide aa76-95        | Biopolymers Facility / Harvard Medical School |
|                                                                     | 2',3'-cyclic nucleotide 3'-phosphodiesterase peptide aa91-110       | Biopolymers Facility / Harvard Medical School |
|                                                                     | Acetyl Cholinesterase                                               | Sigma Aldrich                                 |
|                                                                     | ADAM-10                                                             | Sigma Aldrich                                 |
|                                                                     | alpha-Cristallin                                                    | Stressgen                                     |
|                                                                     | beta-Cristallin                                                     | Sigma Aldrich                                 |
|                                                                     | bovine Myelin Basic Protein                                         | Sigma Aldrich                                 |
|                                                                     | Brain Extract I                                                     | Sigma Aldrich                                 |
|                                                                     | Brain Extract II                                                    | Sigma Aldrich                                 |
|                                                                     | Brain Extract III                                                   | Sigma Aldrich                                 |
|                                                                     | Glial Filament Acidic Protein                                       | Research Diagnostic                           |
|                                                                     | guinea pig Myelin Basic Protein                                     | Sigma Aldrich                                 |
|                                                                     | human Myelin Basic Protein                                          | Sigma Aldrich                                 |
|                                                                     | Myelin-Associated Oligodendrocytic Basic Protein peptide aa 106-125 | Biopolymers Facility / Harvard Medical School |
| Myelin-Associated Oligodendrocytic Basic Protein peptide aa 1-20    | Biopolymers Facility / Harvard Medical School                       |                                               |
| Myelin-Associated Oligodendrocytic Basic Protein peptide aa 121-140 | Biopolymers Facility / Harvard Medical School                       |                                               |
| Myelin-Associated Oligodendrocytic Basic Protein peptide aa 136-155 | Biopolymers Facility / Harvard Medical School                       |                                               |
| Myelin-Associated Oligodendrocytic Basic Protein peptide aa 151-170 | Biopolymers Facility / Harvard Medical School                       |                                               |

|                                                                     |                                               |
|---------------------------------------------------------------------|-----------------------------------------------|
| Myelin-Associated Oligodendrocytic Basic Protein peptide aa 16-35   | Biopolymers Facility / Harvard Medical School |
| Myelin-Associated Oligodendrocytic Basic Protein peptide aa 166-185 | Biopolymers Facility / Harvard Medical School |
| Myelin-Associated Oligodendrocytic Basic Protein peptide aa 181-200 | Biopolymers Facility / Harvard Medical School |
| Myelin-Associated Oligodendrocytic Basic Protein peptide aa 31-50   | Biopolymers Facility / Harvard Medical School |
| Myelin-Associated Oligodendrocytic Basic Protein peptide aa 46-65   | Biopolymers Facility / Harvard Medical School |
| Myelin-Associated Oligodendrocytic Basic Protein peptide aa 61-80   | Biopolymers Facility / Harvard Medical School |
| Myelin-Associated Oligodendrocytic Basic Protein peptide aa 76-95   | Biopolymers Facility / Harvard Medical School |
| Myelin-Associated Oligodendrocytic Basic Protein peptide aa 91-110  | Biopolymers Facility / Harvard Medical School |
| Myelin/oligodendrocyte glycoprotein peptide aa 106-125              | Biopolymers Facility / Harvard Medical School |
| Myelin/oligodendrocyte glycoprotein peptide aa 1-20                 | Biopolymers Facility / Harvard Medical School |
| Myelin/oligodendrocyte glycoprotein peptide aa 121-140              | Biopolymers Facility / Harvard Medical School |
| Myelin/oligodendrocyte glycoprotein peptide aa 136-155              | Biopolymers Facility / Harvard Medical School |
| Myelin/oligodendrocyte glycoprotein peptide aa 151-170              | Biopolymers Facility / Harvard Medical School |
| Myelin/oligodendrocyte glycoprotein peptide aa 16-35                | Biopolymers Facility / Harvard Medical School |
| Myelin/oligodendrocyte glycoprotein peptide aa 166-185              | Biopolymers Facility / Harvard Medical School |
| Myelin/oligodendrocyte glycoprotein peptide aa 181-200              | Biopolymers Facility / Harvard Medical School |
| Myelin/oligodendrocyte glycoprotein peptide aa 196-215              | Biopolymers Facility / Harvard Medical School |
| Myelin/oligodendrocyte glycoprotein peptide aa 211-230              | Biopolymers Facility / Harvard Medical School |
| Myelin/oligodendrocyte glycoprotein peptide aa 226-247              | Biopolymers Facility / Harvard Medical School |
| Myelin/oligodendrocyte glycoprotein peptide aa 31-50                | Biopolymers Facility / Harvard Medical School |
| Myelin/oligodendrocyte glycoprotein peptide aa 35-55                | Biopolymers Facility / Harvard Medical School |
| Myelin/oligodendrocyte glycoprotein peptide aa 46-65                | Biopolymers Facility / Harvard Medical School |
| Myelin/oligodendrocyte glycoprotein peptide aa 61-80                | Biopolymers Facility / Harvard Medical School |
| Myelin/oligodendrocyte glycoprotein peptide aa 76-95                | Biopolymers Facility / Harvard Medical School |
| Myelin/oligodendrocyte glycoprotein peptide aa 91-110               | Biopolymers Facility / Harvard Medical School |
| murine Myelin Basic Protein                                         | Sigma Aldrich                                 |
| Myelin Associated Glycoprotein                                      | Sigma Aldrich                                 |
| Myelin Basic Protein peptide aa 104-123                             | Biopolymers Facility / Harvard Medical School |
| Myelin Basic Protein peptide aa 11-30                               | Biopolymers Facility / Harvard Medical School |
| Myelin Basic Protein peptide aa 113-132                             | Biopolymers Facility / Harvard Medical School |
| Myelin Basic Protein peptide aa 1-20                                | Biopolymers Facility / Harvard Medical School |
| Myelin Basic Protein peptide aa 121-138                             | Biopolymers Facility / Harvard Medical School |
| Myelin Basic Protein peptide aa 124-142                             | Biopolymers Facility / Harvard Medical School |
| Myelin Basic Protein peptide aa 138-147                             | Biopolymers Facility / Harvard Medical School |
| Myelin Basic Protein peptide aa 141-161                             | Biopolymers Facility / Harvard Medical School |
| Myelin Basic Protein peptide aa 143-168                             | Biopolymers Facility / Harvard Medical School |
| Myelin Basic Protein peptide aa 155-178                             | Biopolymers Facility / Harvard Medical School |
| Myelin Basic Protein peptide aa 26-35                               | Biopolymers Facility / Harvard Medical School |
| Myelin Basic Protein peptide aa 31-50                               | Biopolymers Facility / Harvard Medical School |
| Myelin Basic Protein peptide aa 41-60                               | Biopolymers Facility / Harvard Medical School |
| Myelin Basic Protein peptide aa 51-70                               | Biopolymers Facility / Harvard Medical School |
| Myelin Basic Protein peptide aa 61-80                               | Biopolymers Facility / Harvard Medical School |
| Myelin Basic Protein peptide aa 71-92                               | Biopolymers Facility / Harvard Medical School |
| Myelin Basic Protein peptide aa 84-94                               | Biopolymers Facility / Harvard Medical School |
| Myelin Basic Protein peptide aa 89-101                              | Biopolymers Facility / Harvard Medical School |
| Myelin Basic Protein peptide aa 173-186                             | Biopolymers Facility / Harvard Medical School |
| Myelin Basic Protein peptide aa 93-112                              | Biopolymers Facility / Harvard Medical School |
| Myelin Protein 2 peptide aa 106-125                                 | Biopolymers Facility / Harvard Medical School |
| Myelin Protein 2 peptide aa 1-20                                    | Biopolymers Facility / Harvard Medical School |
| Myelin Protein 2 peptide aa 121-132                                 | Biopolymers Facility / Harvard Medical School |
| Myelin Protein 2 peptide aa 16-35                                   | Biopolymers Facility / Harvard Medical School |
| Myelin Protein 2 peptide aa 31-50                                   | Biopolymers Facility / Harvard Medical School |
| Myelin Protein 2 peptide aa 46-65                                   | Biopolymers Facility / Harvard Medical School |
| Myelin Protein 2 peptide aa 61-80                                   | Biopolymers Facility / Harvard Medical School |
| Myelin Protein 2 peptide aa 76-95                                   | Biopolymers Facility / Harvard Medical School |
| Myelin Protein 2 peptide aa 91-110                                  | Biopolymers Facility / Harvard Medical School |
| Neurofilament 160kd                                                 | Chemicon                                      |
| Neurofilament 200kd                                                 | Chemicon                                      |
| Neurofilament 68kd                                                  | Chemicon                                      |
| Neuronal Enolase                                                    | Calbiochem                                    |
| Nicastrin                                                           | GeneTex                                       |
| NMDA receptor                                                       | Novus Biologicals                             |
| NOGO                                                                | Sigma Aldrich                                 |
| Olygodendrocyte-Specific Protein peptide aa 106-125                 | Biopolymers Facility / Harvard Medical School |
| Olygodendrocyte-Specific Protein peptide aa 1-20                    | Biopolymers Facility / Harvard Medical School |
| Olygodendrocyte-Specific Protein peptide aa 121-140                 | Biopolymers Facility / Harvard Medical School |
| Olygodendrocyte-Specific Protein peptide aa 136-155                 | Biopolymers Facility / Harvard Medical School |
| Olygodendrocyte-Specific Protein peptide aa 151-170                 | Biopolymers Facility / Harvard Medical School |
| Olygodendrocyte-Specific Protein peptide aa 16-35                   | Biopolymers Facility / Harvard Medical School |

|                                                     |                                               |
|-----------------------------------------------------|-----------------------------------------------|
| Olygodendrocyte-Specific Protein peptide aa 166-185 | Biopolymers Facility / Harvard Medical School |
| Olygodendrocyte-Specific Protein peptide aa 181-199 | Biopolymers Facility / Harvard Medical School |
| Olygodendrocyte-Specific Protein peptide aa 195-217 | Biopolymers Facility / Harvard Medical School |
| Olygodendrocyte-Specific Protein peptide aa 31-50   | Biopolymers Facility / Harvard Medical School |
| Olygodendrocyte-Specific Protein peptide aa 46-65   | Biopolymers Facility / Harvard Medical School |
| Olygodendrocyte-Specific Protein peptide aa 61-80   | Biopolymers Facility / Harvard Medical School |
| Olygodendrocyte-Specific Protein peptide aa 76-95   | Biopolymers Facility / Harvard Medical School |
| Olygodendrocyte-Specific Protein peptide aa 91-110  | Biopolymers Facility / Harvard Medical School |
| Proteolipid Protein                                 | Abnova                                        |
| Proteolipid Protein peptide aa 100-119              | Biopolymers Facility / Harvard Medical School |
| Proteolipid Protein peptide aa 10-29                | Biopolymers Facility / Harvard Medical School |
| Proteolipid Protein peptide aa 110-129              | Biopolymers Facility / Harvard Medical School |
| Proteolipid Protein peptide aa 1-19                 | Biopolymers Facility / Harvard Medical School |
| Proteolipid Protein peptide aa 125-141              | Biopolymers Facility / Harvard Medical School |
| Proteolipid Protein peptide aa 137-150              | Biopolymers Facility / Harvard Medical School |
| Proteolipid Protein peptide aa 137-154              | Biopolymers Facility / Harvard Medical School |
| Proteolipid Protein peptide aa 150-163              | Biopolymers Facility / Harvard Medical School |
| Proteolipid Protein peptide aa 151-173              | Biopolymers Facility / Harvard Medical School |
| Proteolipid Protein peptide aa 158-166              | Biopolymers Facility / Harvard Medical School |
| Proteolipid Protein peptide aa 161-180              | Biopolymers Facility / Harvard Medical School |
| Proteolipid Protein peptide aa 178-191              | Biopolymers Facility / Harvard Medical School |
| Proteolipid Protein peptide aa 180-199              | Biopolymers Facility / Harvard Medical School |
| Proteolipid Protein peptide aa 190-209              | Biopolymers Facility / Harvard Medical School |
| Proteolipid Protein peptide aa 20-39                | Biopolymers Facility / Harvard Medical School |
| Proteolipid Protein peptide aa 205-220              | Biopolymers Facility / Harvard Medical School |
| Proteolipid Protein peptide aa 215-232              | Biopolymers Facility / Harvard Medical School |
| Proteolipid Protein peptide aa 220-239              | Biopolymers Facility / Harvard Medical School |
| Proteolipid Protein peptide aa 220-249              | Biopolymers Facility / Harvard Medical School |
| Proteolipid Protein peptide aa 248-259              | Biopolymers Facility / Harvard Medical School |
| Proteolipid Protein peptide aa 250-269              | Biopolymers Facility / Harvard Medical School |
| Proteolipid Protein peptide aa 265-277              | Biopolymers Facility / Harvard Medical School |
| Proteolipid Protein peptide aa 35-50                | Biopolymers Facility / Harvard Medical School |
| Proteolipid Protein peptide aa 40-59                | Biopolymers Facility / Harvard Medical School |
| Proteolipid Protein peptide aa 50-69                | Biopolymers Facility / Harvard Medical School |
| Proteolipid Protein peptide aa 65-84                | Biopolymers Facility / Harvard Medical School |
| Proteolipid Protein peptide aa 80-99                | Biopolymers Facility / Harvard Medical School |
| Proteolipid Protein peptide aa 91-110               | Biopolymers Facility / Harvard Medical School |
| Retinol Binding Protein                             | Sigma Aldrich                                 |
| S100beta protein                                    | Assay Designs                                 |
| Super Oxide Dismutase                               | Sigma Aldrich                                 |
| Synuclein, beta                                     | Sigma Aldrich                                 |
| Synuclein, gamma                                    | Sigma Aldrich                                 |
| <b>Tissue</b>                                       |                                               |
| Amygdala                                            | ProSci Inc.                                   |
| Amygdala AD                                         | ProSci Inc.                                   |
| Brain lysate                                        | ProSci Inc.                                   |
| Brain Tissue Membrane                               | ProSci Inc.                                   |
| Cerebellar pedunculus                               | ProSci Inc.                                   |
| Cerebral meninges                                   | ProSci Inc.                                   |
| Corpus Callosum                                     | ProSci Inc.                                   |
| Corpus Callosum AD                                  | ProSci Inc.                                   |
| Diencephalon                                        | ProSci Inc.                                   |
| Fetal brain                                         | ProSci Inc.                                   |
| Frontal lobe                                        | ProSci Inc.                                   |
| Frontal lobe AD                                     | ProSci Inc.                                   |
| Hippocampus                                         | ProSci Inc.                                   |
| Hippocampus AD                                      | ProSci Inc.                                   |
| Insula                                              | ProSci Inc.                                   |
| Occipital lobe                                      | ProSci Inc.                                   |
| Occipital lobe AD                                   | ProSci Inc.                                   |
| Olfactory region                                    | ProSci Inc.                                   |
| Optic Nerve                                         | ProSci Inc.                                   |
| Parietal lobe                                       | ProSci Inc.                                   |
| Parietal lobe AD                                    | ProSci Inc.                                   |
| Pons                                                | ProSci Inc.                                   |
| Pons AD                                             | ProSci Inc.                                   |
| Postcentral gyrus                                   | ProSci Inc.                                   |
| Postcentral gyrus AD                                | ProSci Inc.                                   |
| Precentral gyrus                                    | ProSci Inc.                                   |
| Precentral gyrus AD                                 | ProSci Inc.                                   |

|                    |                                                            |                     |
|--------------------|------------------------------------------------------------|---------------------|
|                    | Spinal cord                                                | ProSci Inc.         |
|                    | Temporal lobe                                              | ProSci Inc.         |
|                    | Temporal lobe AD                                           | ProSci Inc.         |
|                    | Thalamus                                                   | ProSci Inc.         |
|                    | Thalamus AD                                                | ProSci Inc.         |
| <b>AD related</b>  | Amyloid beta                                               | Sigma Aldrich       |
|                    | Amyloid beta 10-20                                         | Sigma Aldrich       |
|                    | Amyloid beta 1-12                                          | Sigma Aldrich       |
|                    | Amyloid beta 12-28                                         | Sigma Aldrich       |
|                    | Amyloid beta 1-23                                          | Sigma Aldrich       |
|                    | Amyloid beta 1-38                                          | Sigma Aldrich       |
|                    | Amyloid beta 17-40                                         | Sigma Aldrich       |
|                    | Amyloid beta 25-35                                         | Sigma Aldrich       |
|                    | Amyloid beta 34-42                                         | Sigma Aldrich       |
|                    | Amyloid bri protein precursor 227                          | Sigma Aldrich       |
|                    | Amyloid DAN Protein Fragment 1-34                          | Sigma Aldrich       |
|                    | Amyloid Precursor Protein                                  | Sigma Aldrich       |
|                    | Amyloid protein no AB component                            | Sigma Aldrich       |
|                    | Secreted amyloid precursor protein (SAP) beta              | Sigma Aldrich       |
|                    | Tau isoform variant 0N3R                                   | Sigma Aldrich       |
|                    | Tau isoform variant 1N3R                                   | Sigma Aldrich       |
|                    | Tau isoform variant 0N4R                                   | Sigma Aldrich       |
|                    | Tau isoform variant 2N3R                                   | Sigma Aldrich       |
|                    | Tau phospho Ser412                                         | Sigma Aldrich       |
|                    | Tau phospho Ser441                                         | Sigma Aldrich       |
| Tau phospho Thr181 | Sigma Aldrich                                              |                     |
| Tau Protein human  | EMD Biosciences                                            |                     |
| <b>Lipids</b>      | (±)9-HODE                                                  | Cayman Chemical     |
|                    | 1 Palmitoyl-2-(5'oxo-Valeroyl)-sn-Glycero-3-Phosphocholine | Avanti Polar Lipids |
|                    | 15a-hydroxycholestene                                      | Avanti Polar Lipids |
|                    | 15-ketocholestane                                          | Avanti Polar Lipids |
|                    | 15-ketocholestene                                          | Avanti Polar Lipids |
|                    | 1-Palmitoil-2-(9'oxo-Nonanoyl)-sn-Glycero-3-Phosphocholine | Avanti Polar Lipids |
|                    | 1-Palmitoil-2-Azelaoyl-sn-Glycero-3-Phosphocholine         | Avanti Polar Lipids |
|                    | 1-Palmitoil-2-Glutaroyl-sn-Glycero-3-Phosphocholine        | Avanti Polar Lipids |
|                    | 5 α-cholestane-3 β,15 α-diol                               | Avanti Polar Lipids |
|                    | 9(S)-HODE                                                  | Cayman Chemical     |
|                    | Asialoganglioside-GM1                                      | Sigma Aldrich       |
|                    | Asialoganglioside-GM2                                      | Sigma Aldrich       |
|                    | Brain ceramides                                            | Avanti Polar Lipids |
|                    | Brain D-erythrospingosine                                  | Avanti Polar Lipids |
|                    | Brain lysophosphatidylethanolamine                         | Avanti Polar Lipids |
|                    | Brain L-α-lysophosphatidylserine                           | Avanti Polar Lipids |
|                    | Brain L-α-phosphatidylcholine                              | Avanti Polar Lipids |
|                    | Brain L-α-phosphatidyl-ethanolamine                        | Avanti Polar Lipids |
|                    | Brain L-α-phosphatidylserine                               | Avanti Polar Lipids |
|                    | Brain polar lipid extract                                  | Avanti Polar Lipids |
|                    | Brain sphingomyelin                                        | Avanti Polar Lipids |
|                    | Brain sulfatide                                            | Avanti Polar Lipids |
|                    | Brain total lipid extract                                  | Avanti Polar Lipids |
|                    | Cardiolipin                                                | Sigma Aldrich       |
|                    | Ceramide                                                   | Sigma Aldrich       |
|                    | Ceramide 1-phosphate                                       | Sigma Aldrich       |
|                    | Cholesterol                                                | Sigma Aldrich       |
|                    | Disialoganglioside-GD1B                                    | Sigma Aldrich       |
|                    | Disialoganglioside-GD2                                     | Sigma Aldrich       |
|                    | Disialoganglioside GD1a                                    | Sigma Aldrich       |
|                    | Disialoganglioside GD3                                     | HyTest              |
|                    | Fucosyl-GM1                                                | Calbiochem          |
|                    | Galactocerebrosides                                        | Sigma Aldrich       |
|                    | Ganglioside Mixture                                        | Sigma Aldrich       |
|                    | Ganglioside-GM4                                            | Calbiochem          |
|                    | Gangliotetraosylceramide asialo-GM1                        | Avanti Polar Lipids |
|                    | HDL                                                        | Sigma Aldrich       |
|                    | Hexacosanoic acid (26)                                     | Sigma Aldrich       |
|                    | Hydroxy fatty acid ceramide                                | Sigma Aldrich       |
|                    | Isoprostone F2 I                                           | Cayman Chemical     |
|                    | Lactocerebrosides                                          | Sigma Aldrich       |
|                    | Lactosylceramide                                           | Calbiochem          |

|                                                |                     |
|------------------------------------------------|---------------------|
| LDL                                            | Sigma Aldrich       |
| Lipid A, diphosphoryl from Salmonella enterica | Sigma Aldrich       |
| Lipopolysaccharides from Escherichia coli      | Sigma Aldrich       |
| Lipopolysaccharides from Pseudomona aeruginosa | Sigma Aldrich       |
| Lipopolysaccharides from Salmonella enterica   | Sigma Aldrich       |
| Lyso-GM1                                       | Calbiochem          |
| Monosialoganglioside GM1                       | Sigma Aldrich       |
| Monosialoganglioside GM2                       | Sigma Aldrich       |
| Monosialoganglioside GM3                       | Meridian            |
| N-Hexanoyl-D-sphingosin                        | Sigma Aldrich       |
| Non-hydroxy fatty acid ceramide                | Sigma Aldrich       |
| Phosphatidylinositol-4 phosphate               | Sigma Aldrich       |
| Squalene                                       | Sigma Aldrich       |
| Sulfatides                                     | Sigma Aldrich       |
| Tetracosanoic acid (24)                        | Sigma Aldrich       |
| Tetrasialoganglioside-GQ1B                     | Calbiochem          |
| TNPAL Galactocerebroside                       | Sigma Aldrich       |
| Total brain gangliosides                       | Avanti Polar Lipids |
| Total cerebroside                              | Avanti Polar Lipids |
| Trisialoganglioside GT1a                       | HyTest              |
| Trisialoganglioside-GT1B                       | Sigma Aldrich       |



Supplementary Table 4: Specificity of the IgG antibodies showing a significant (FDR &lt; 0.05) downregulation in TCDD-treated mice

| Antigen                                                             | FDR      |
|---------------------------------------------------------------------|----------|
| 70 kDa. Heat Shock Protein peptide aa 331-350                       | 1.78E-05 |
| 60 kDa. Heat Shock Protein peptide aa 255-275                       | 0.00547  |
| 60 kDa. Heat Shock Protein peptide aa 13-35                         | 0.00547  |
| 32 kDa. Heat Shock protein                                          | 0.00547  |
| Myelin Basic Protein peptide aa 138-147                             | 0.00547  |
| Proteolipid Protein peptide aa 1-19                                 | 0.00547  |
| Proteolipid Protein peptide aa 161-180                              | 0.00547  |
| Proteolipid Protein peptide aa 10-29                                | 0.00547  |
| 60 kDa. Heat Shock Protein peptide aa 1-20                          | 0.0055   |
| 70 kDa. Heat Shock Protein peptide aa 61-80                         | 0.0055   |
| Ceramide                                                            | 0.0055   |
| Myelin-Associated Oligodendrocytic Basic Protein peptide aa 91-110  | 0.0055   |
| Proteolipid Protein peptide aa 137-150                              | 0.0055   |
| NOGO                                                                | 0.00557  |
| Oligodendrocyte-Specific Protein peptide aa 76-95                   | 0.00557  |
| b-Cristallin                                                        | 0.0058   |
| Myelin-Associated Oligodendrocytic Basic Protein peptide aa 121-140 | 0.00703  |
| 60 kDa. Heat Shock Protein peptide aa 225-244                       | 0.00708  |
| Myelin Basic Protein peptide aa 113-132                             | 0.00925  |
| Oligodendrocyte-Specific Protein peptide aa 46-65                   | 0.00925  |
| Myelin Protein 2 peptide aa 91-110                                  | 0.00925  |
| Myelin-Associated Oligodendrocytic Basic Protein peptide aa 151-170 | 0.0093   |
| Myelin/oligodendrocyte glycoprotein peptide aa 31-50                | 0.0093   |
| NT-3                                                                | 0.0093   |
| Proteolipid Protein peptide aa 40-59                                | 0.0116   |
| 70 kDa. Heat Shock Protein peptide aa 421-440                       | 0.0118   |
| Myelin Basic Protein peptide aa 173-186                             | 0.0125   |
| 70 kDa. Heat Shock Protein peptide aa 121-140                       | 0.0132   |
| 2',3'-cyclic nucleotide 3'-phosphodiesterase peptide aa 391-410     | 0.0132   |
| Oligodendrocyte-Specific Protein peptide aa 136-155                 | 0.0132   |
| Oligodendrocyte-Specific Protein peptide aa 106-125                 | 0.0134   |
| 70 kDa. Heat Shock Protein peptide aa 136-155                       | 0.0141   |
| 2',3'-cyclic nucleotide 3'-phosphodiesterase peptide aa 406-421     | 0.0141   |
| Myelin-Associated Oligodendrocytic Basic Protein peptide aa 166-185 | 0.0143   |
| Myelin Protein 2 peptide aa 1-20                                    | 0.0143   |
| Myelin Protein 2 peptide aa 76-95                                   | 0.0144   |
| Proteolipid Protein peptide aa 125-141                              | 0.0144   |
| Proteolipid Protein peptide aa 178-191                              | 0.0144   |
| 40 kDa. Heat Shock Protein                                          | 0.0145   |
| 2',3'-cyclic nucleotide 3'-phosphodiesterase peptide aa 106-125     | 0.0158   |
| Oligodendrocyte-Specific Protein peptide aa 195-217                 | 0.0174   |
| 2',3'-cyclic nucleotide 3'-phosphodiesterase peptide aa 240-259     | 0.0187   |
| 70 kDa. Heat Shock Protein peptide aa 76-95                         | 0.0194   |
| Proteolipid Protein peptide aa 265-277                              | 0.0194   |
| Myelin Basic Protein peptide aa 89-101                              | 0.0199   |
| Myelin Basic Protein peptide aa 71-92                               | 0.0199   |
| Myelin-Associated Oligodendrocytic Basic Protein peptide aa 16-35   | 0.0199   |
| Proteolipid Protein peptide aa 265-277                              | 0.0199   |
| 60 kDa. Heat Shock Protein peptide aa 46-65                         | 0.0241   |
| 70 kDa. Heat Shock Protein peptide aa 166-185                       | 0.0241   |
| 2',3'-cyclic nucleotide 3'-phosphodiesterase peptide aa 151-170     | 0.0241   |
| 2',3'-cyclic nucleotide 3'-phosphodiesterase peptide aa 376-395     | 0.0241   |
| Myelin Basic Protein peptide aa 11-30                               | 0.0241   |
| Myelin/oligodendrocyte glycoprotein peptide aa 211-230              | 0.0241   |
| Proteolipid Protein peptide aa 265-277                              | 0.0241   |
| 70 kDa. Heat Shock Protein peptide aa 181-199                       | 0.0242   |
| Oligodendrocyte-Specific Protein peptide aa 31-50                   | 0.0242   |
| Proteolipid Protein peptide aa 265-277                              | 0.0242   |
| Myelin/oligodendrocyte glycoprotein peptide aa 91-110               | 0.0249   |
| Optic Nerve lysate                                                  | 0.0249   |
| 2',3'-cyclic nucleotide 3'-phosphodiesterase peptide aa 361-380     | 0.0258   |
| Lactosylceramide                                                    | 0.0258   |
| Myelin Protein 2 peptide aa 31-50                                   | 0.0258   |
| Myelin Basic Protein peptide aa 1-20                                | 0.028    |

|                                                                     |        |
|---------------------------------------------------------------------|--------|
| NMDA receptor                                                       | 0.0285 |
| CNF                                                                 | 0.0289 |
| 2',3'-cyclic nucleotide 3'-phosphodiesterase peptide aa 136-155     | 0.0292 |
| Myelin Basic Protein peptide aa 141-161                             | 0.0298 |
| 70 kDa. Heat Shock Protein peptide aa 406-425                       | 0.0307 |
| 2',3'-cyclic nucleotide 3'-phosphodiesterase peptide aa 210-229     | 0.0307 |
| Galactocerebrosides                                                 | 0.0307 |
| Myelin/oligodendrocyte glycoprotein peptide aa 46-65                | 0.0307 |
| Proteolipid Protein peptide aa 150-163                              | 0.0307 |
| Proteolipid Protein peptide aa 265-277                              | 0.0307 |
| Proteolipid Protein peptide aa 80-99                                | 0.0307 |
| 60 kDa. Heat Shock Protein peptide aa 210-229                       | 0.0323 |
| Proteolipid Protein peptide aa 137-154                              | 0.0324 |
| 2',3'-cyclic nucleotide 3'-phosphodiesterase peptide aa 1-20        | 0.0337 |
| 2',3'-cyclic nucleotide 3'-phosphodiesterase peptide aa 225-244     | 0.0337 |
| Myelin-Associated Oligodendrocytic Basic Protein peptide aa 61-80   | 0.0337 |
| Proteolipid Protein peptide aa 158-166                              | 0.0337 |
| Ceramide 1 phosphate                                                | 0.0346 |
| Myelin-Associated Oligodendrocytic Basic Protein peptide aa 136-155 | 0.0369 |
| Myelin Basic Protein peptide aa 155-178                             | 0.0379 |
| Myelin/oligodendrocyte glycoprotein peptide aa 106-125              | 0.0392 |
| Proteolipid Protein peptide aa 180-199                              | 0.0408 |
| Myelin Protein 2 peptide aa 121-132                                 | 0.0413 |
| Myelin Basic Protein peptide aa 104-123                             | 0.0419 |
| 70 kDa. Heat Shock Protein                                          | 0.0421 |
| Non h fatty acid ceramide                                           | 0.0421 |
| Myelin-Associated Glycoprotein                                      | 0.0452 |
| Myelin Basic Protein peptide aa 143-168                             | 0.0452 |
| 2',3'-cyclic nucleotide 3'-phosphodiesterase peptide aa 91-110      | 0.047  |
| 2',3'-cyclic nucleotide 3'-phosphodiesterase peptide aa 181-199     | 0.0476 |
| 70 kDa. Heat Shock Protein peptide aa 255-275                       | 0.0486 |
| Brain ceramides                                                     | 0.0486 |
| Myelin Protein 2 peptide aa 46-65                                   | 0.0496 |

Supplementary Table 5:

| <b>Treatment</b>                            | <b>Incidence</b> | <b>Mean day of onset<br/>(mean <math>\pm</math> SD)</b> | <b>Mean maximum<br/>score (mean <math>\pm</math> SD)</b> |
|---------------------------------------------|------------------|---------------------------------------------------------|----------------------------------------------------------|
| <b>CD4<sup>+</sup> Control</b>              | 7 of 7 (100 %)   | 12.3 $\pm$ 1.9                                          | 2.7 $\pm$ 1.0                                            |
| <b>CD4<sup>+</sup> TCDD</b>                 | 3 of 6 (57 %)    | 13.3 $\pm$ 0.6                                          | 0.7 $\pm$ 0.8*                                           |
| <b>CD4<sup>+</sup>CD25<sup>-</sup> TCDD</b> | 3 of 4 (75 %)    | 11.0 $\pm$ 0.0                                          | 2.6 $\pm$ 1.8                                            |

Naïve C57BL/6 mice received CD4<sup>+</sup> or CD4<sup>+</sup>CD25<sup>-</sup> T cells ( $5 \times 10^6$ ) purified from TCDD or control treated mice 10 days after immunization with MOG<sub>35-55</sub>/CFA. 24 h later EAE was induced in the recipient mice with MOG<sub>35-55</sub>/CFA, and the mice were monitored for EAE development. Statistical analysis was performed by comparing groups using one-way analysis of variance.

\*  $P < 0.05$  vs CD4<sup>+</sup> control group.

Supplementary Table 6:

| <b>Treatment</b>                      | <b>Incidence</b> | <b>Mean day of onset<br/>(mean <math>\pm</math> SD)</b> | <b>Mean maximum<br/>score (mean <math>\pm</math> SD)</b> |
|---------------------------------------|------------------|---------------------------------------------------------|----------------------------------------------------------|
| <b>WT CD4<sup>+</sup> Control</b>     | 4 of 4 (100 %)   | 13.3 $\pm$ 2.1                                          | 2.1 $\pm$ 1.0                                            |
| <b>WT CD4<sup>+</sup> TCDD</b>        | 2 of 4 (50 %)    | 13.0 $\pm$ 0.0                                          | 0.8 $\pm$ 1.0*                                           |
| <b>DNTGFbRII CD4<sup>+</sup> TCDD</b> | 4 of 4 (100 %)   | 14.0 $\pm$ 1.0                                          | 2.6 $\pm$ 1.8                                            |

WT or DNTGFbRII mice received CD4<sup>+</sup> T cells ( $5 \times 10^6$ ) purified from TCDD or control treated mice 10 days after immunization with MOG<sub>35-55</sub>/CFA. 24 h later EAE was induced in the recipient mice with MOG<sub>35-55</sub>/CFA, and the mice were monitored for EAE development. Statistical analysis was performed by comparing groups using one-way analysis of variance.

\*  $P < 0.05$  vs CD4<sup>+</sup> control group.

Supplementary Table 7:

| <b>Treatment</b> | <b>Incidence</b> | <b>Mean day of onset<br/>(mean <math>\pm</math> SD)</b> | <b>Mean maximum<br/>score (mean <math>\pm</math> SD)</b> |
|------------------|------------------|---------------------------------------------------------|----------------------------------------------------------|
| <b>WT</b>        | 9 of 9 (100 %)   | 15.7 $\pm$ 1.9                                          | 2.2 $\pm$ 0.9                                            |
| <b>AHR-d</b>     | 9 of 9 (100 %)   | 13.3 $\pm$ 1.1                                          | 3.3 $\pm$ 0.8*                                           |

EAE was induced in C57BL/6 (WT) or AHR-d mice with MOG<sub>35-55</sub>/CFA and the mice were monitored for EAE development. Statistical analysis was performed by comparing groups using Student's *t*-test.

\*  $P < 0.0295$  vs WT group.

Supplementary Table 8:

| <b>Treatment</b> | <b>Incidence</b> | <b>Mean day of onset<br/>(mean <math>\pm</math> SD)</b> | <b>Mean maximum<br/>score (mean <math>\pm</math> SD)</b> |
|------------------|------------------|---------------------------------------------------------|----------------------------------------------------------|
| <b>Control</b>   | 9 of 9 (100 %)   | 15.6 $\pm$ 4.7                                          | 2.61 $\pm$ 1.5                                           |
| <b>ITE</b>       | 8 of 9 (89 %)    | 16.25 $\pm$ 3.8                                         | 2.11 $\pm$ 1.6                                           |

C57BL/6 mice were treated with PBS (Control) or ITE, immunized with MOG<sub>35-55</sub> peptide in CFA and monitored for EAE development.

Supplementary Table 9:

| <b>Treatment</b> | <b>Incidence</b> | <b>Mean day of onset<br/>(mean <math>\pm</math> SD)</b> | <b>Mean maximum<br/>score (mean <math>\pm</math> SD)</b> |
|------------------|------------------|---------------------------------------------------------|----------------------------------------------------------|
| <b>Control</b>   | 11 of 14 (79 %)  | 13.7 $\pm$ 1.9                                          | 2 $\pm$ 1.4                                              |
| <b>FICZ</b>      | 12 of 15 (80 %)  | 13.3 $\pm$ 1.5                                          | 2.7 $\pm$ 1.8                                            |

Mice were treated with PBS (Control) or ITE, immunized with MOG<sub>35-55</sub> peptide in CFA and monitored for EAE development.

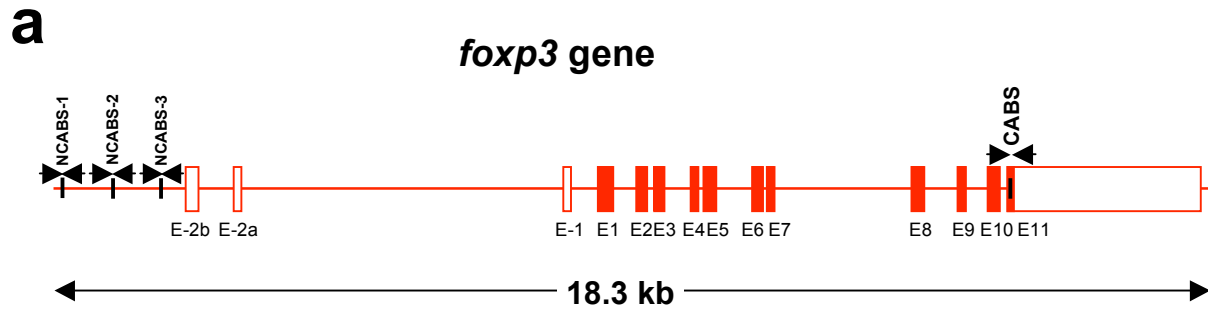

**b**

**CABS**

|           |                                                                                    |
|-----------|------------------------------------------------------------------------------------|
| Zebrafish | AGAATGCGGTTTCGACATAACCTCAGCCTTCATAAGTGCTT <b>TTGTGCGTGT</b> GAAGGAAGGA             |
| Human     | AGAACGCCATCCGCCACAACCTGAGTCTGCACAAGTGCTT <b>TTGTGCGGGT</b> GGAGAGCGAGA             |
| Mouse     | 13205 AGAATGCCATCCGCCACAACCTGAGCCTGCACAAGTGCTT <b>TTGTGCGAGT</b> GGAGAGCGAGA 13264 |
|           | **** * * * * * * * * * * * * * * * * * * * * * * * * * * * * * *                   |
|           |                                                                                    |
| Zebrafish | AAGGTTCAAGTTGGACTGTGGATGAAGAGGAATTTCTTAGAAGAAAAGGTCAA                              |
| Human     | AGGGGGCTGTGTGGACCGTGGATGAGCTGGAGTTCGCAAGAAACGGAGCCAG                               |
| Mouse     | 13265 AGGGAGCAGTGTGGACCGTAGATGAATTTGAGTTTCGCAAGAAGAGGAGCCAA 14317                  |
|           | * * * * * * * * * * * * * * * * * * * * * * * * * * * * * *                        |

**c**

**NCABS**

|               |                   |
|---------------|-------------------|
| NCABS-1 -2269 | TCCTCTCAACTCAGGAC |
| NCABS-2 -1596 | GGACACGCAGC       |
| NCABS-3 -800  | TGTGCGTGTTA       |

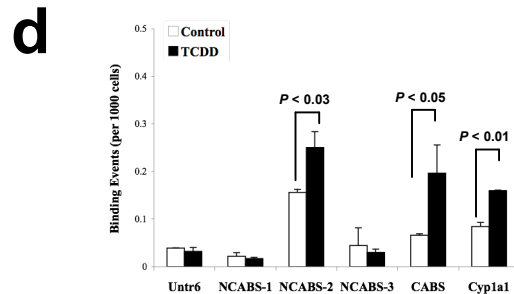

Supplementary Figure 1



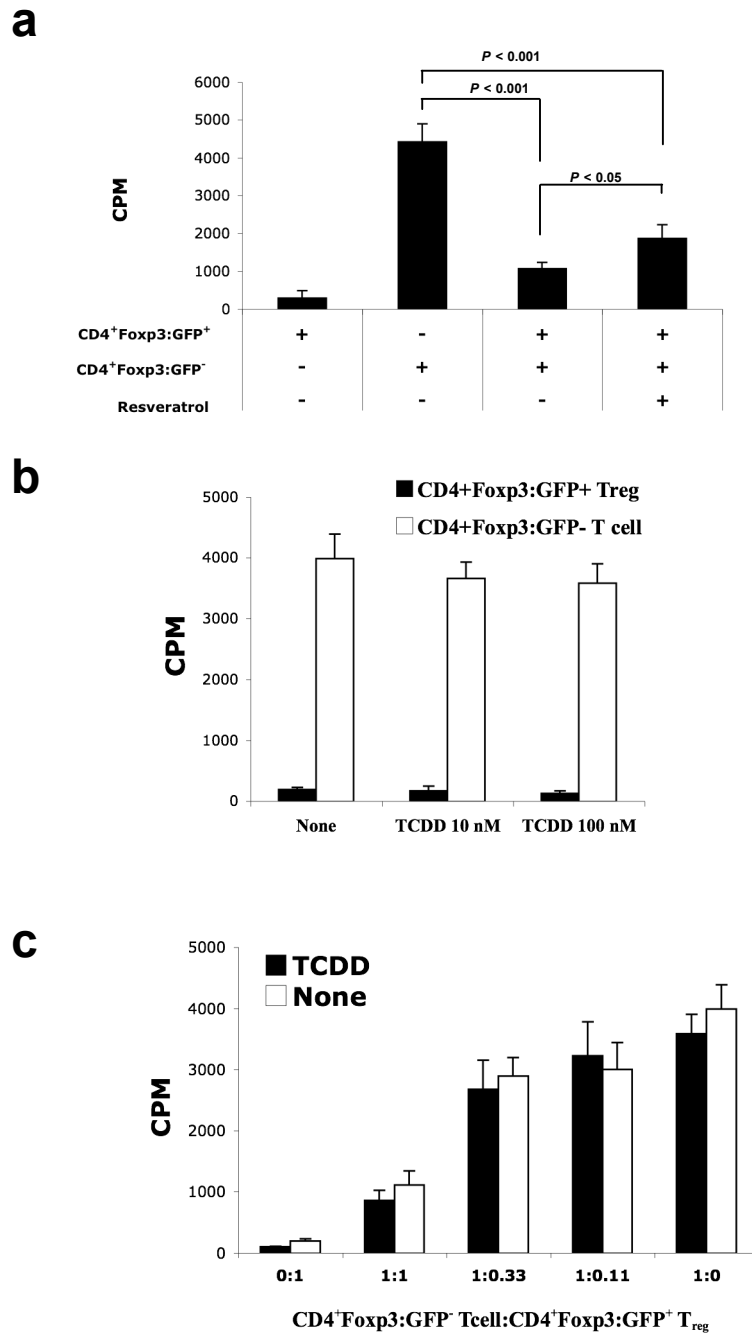

Supplementary Figure 2

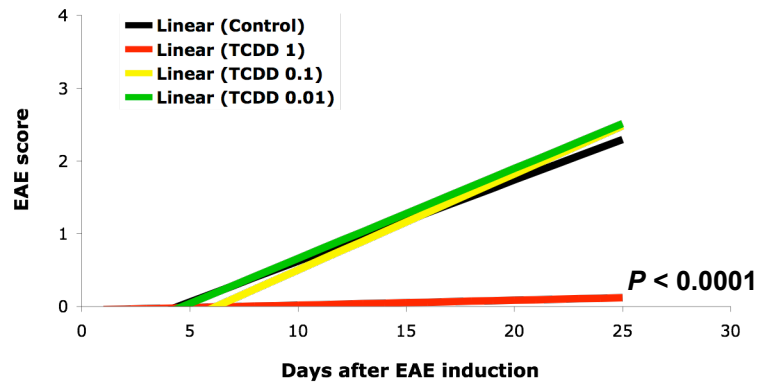

Supplementary Figure 3

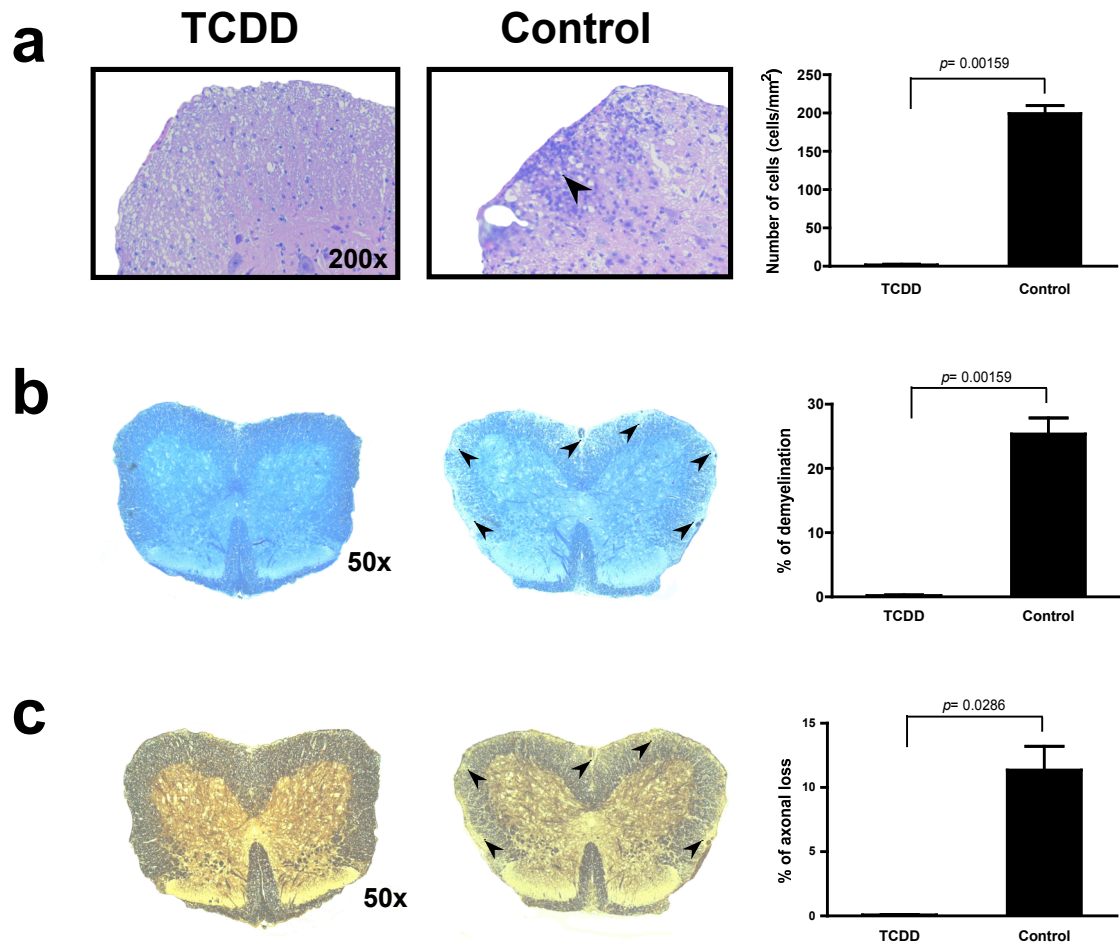

Supplementary Figure 4

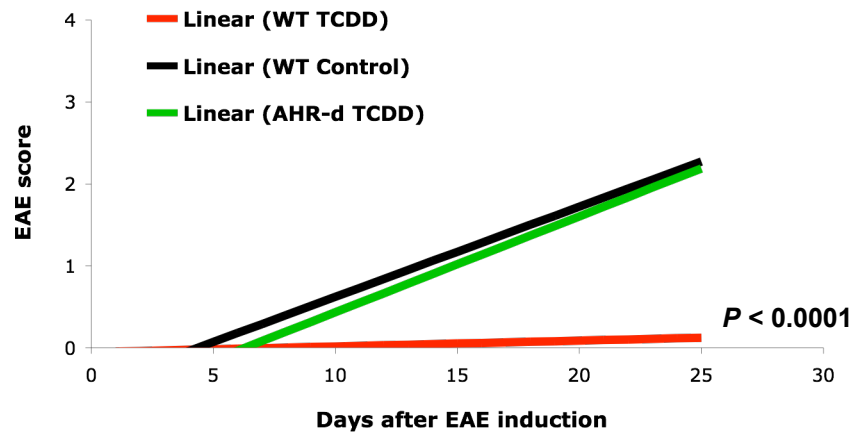

Supplementary Figure 5

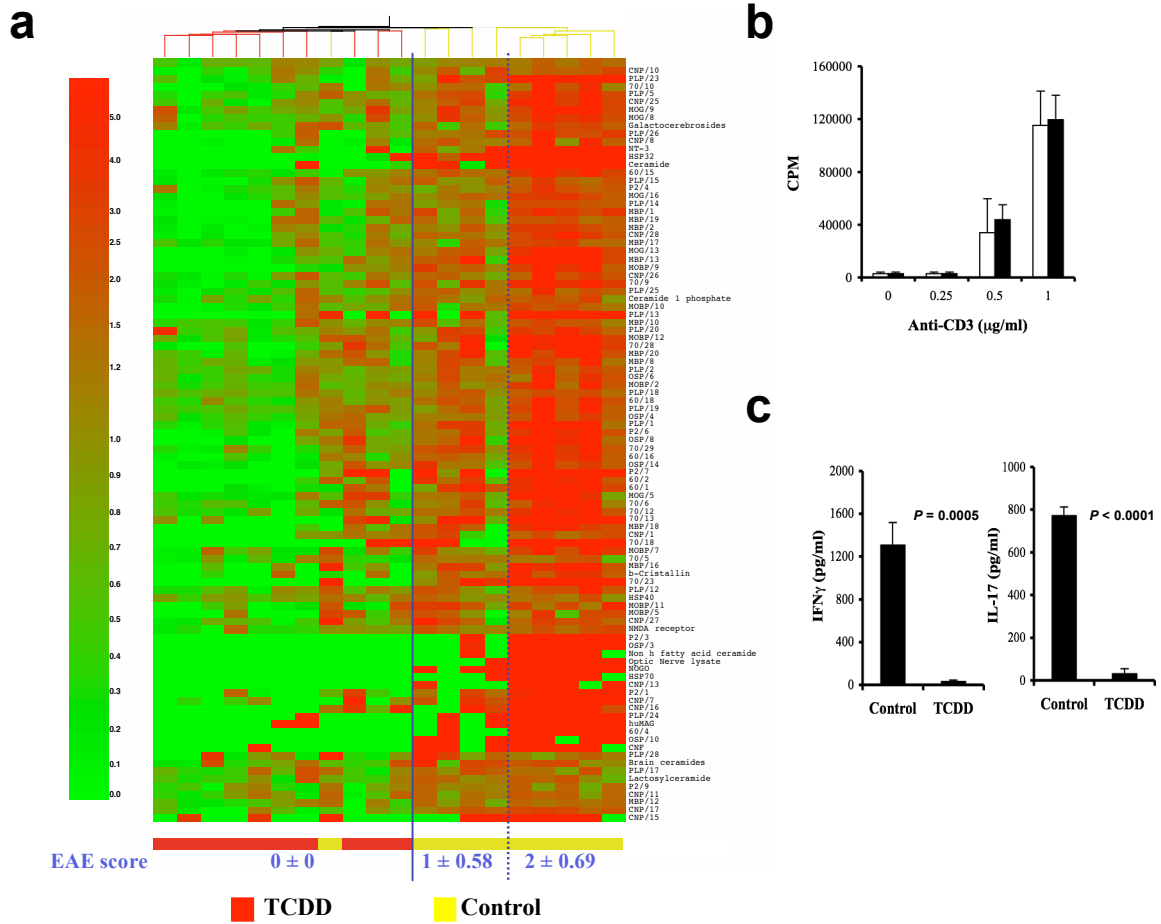

Supplementary Figure 6

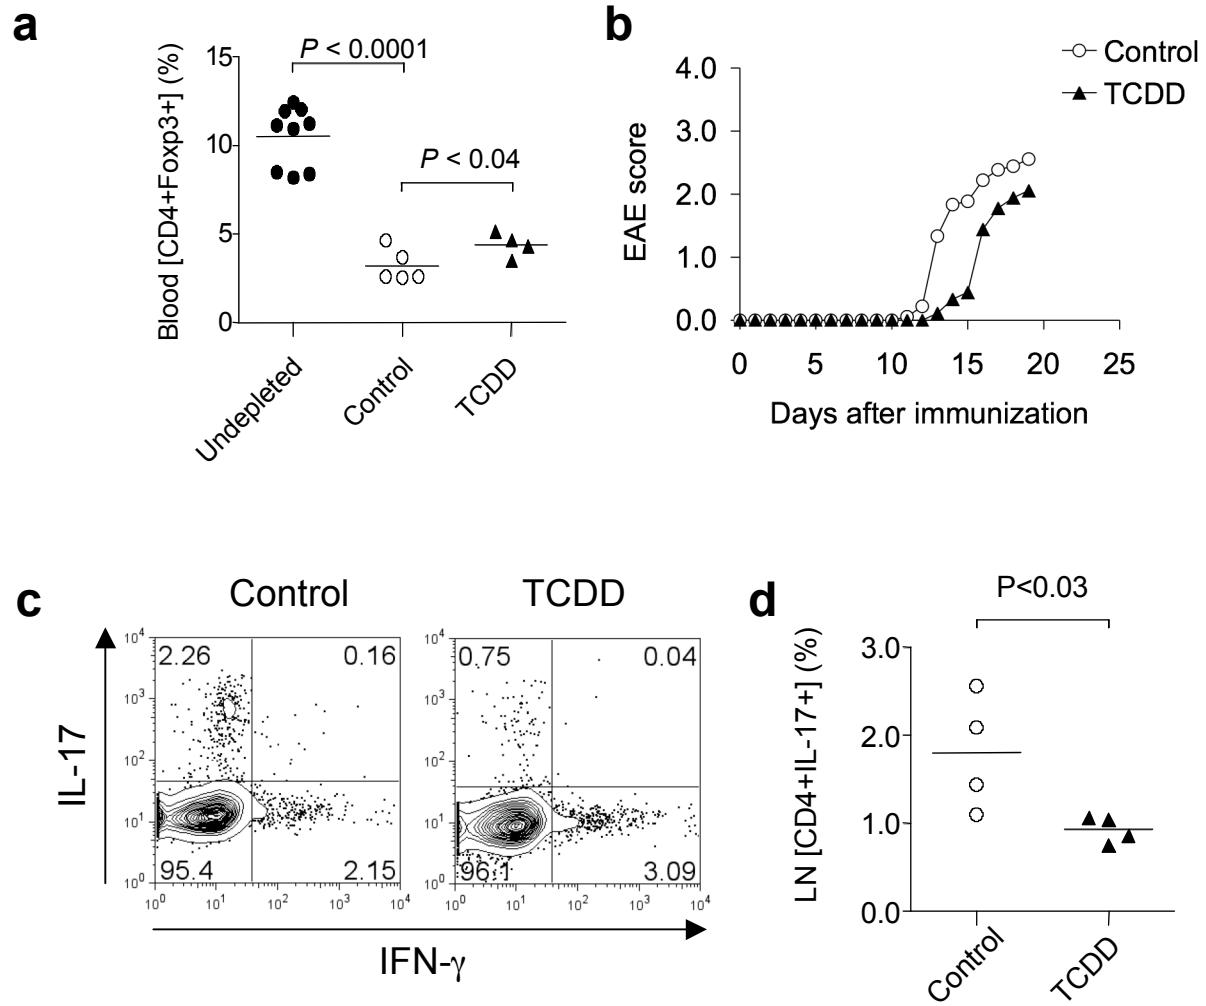

Supplementary Figure 7

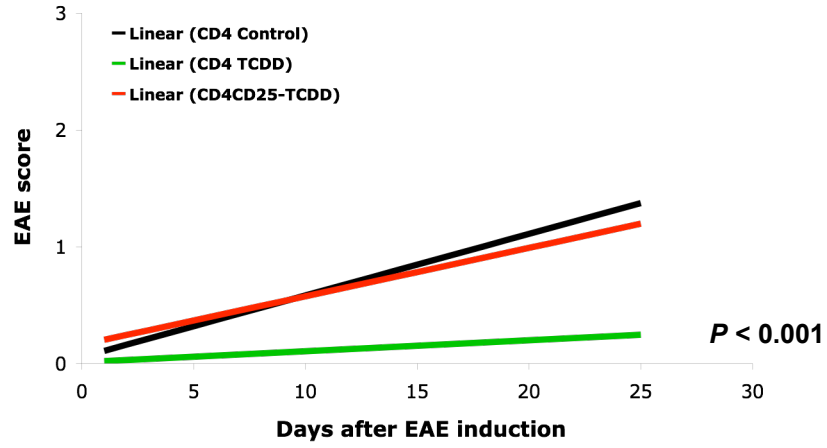

Supplementary Figure 8

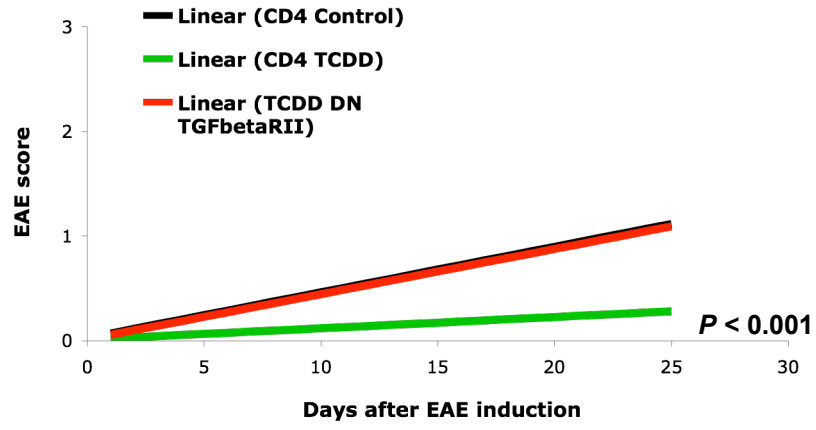

Supplementary Figure 9



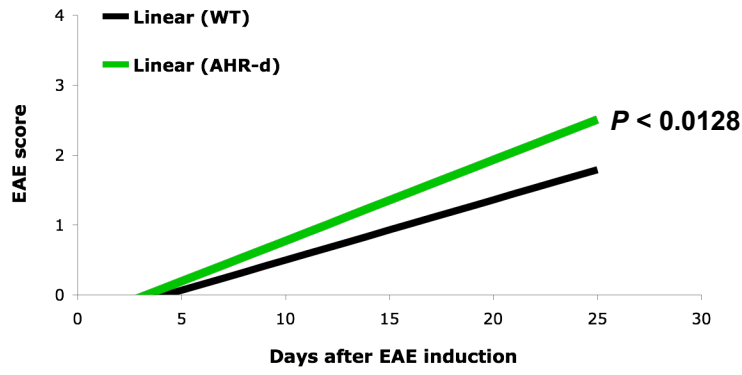

Supplementary Figure 10

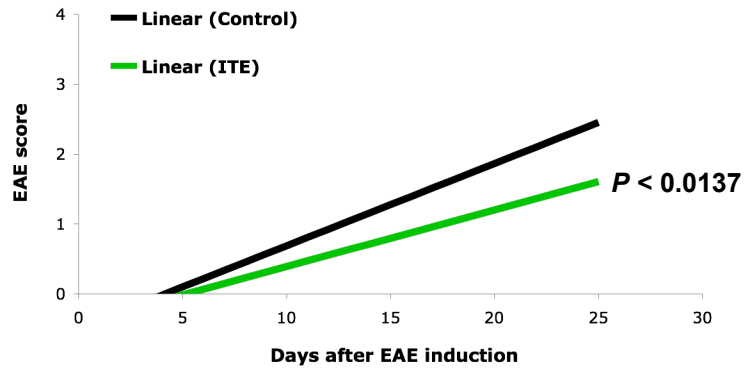

Supplementary Figure 11

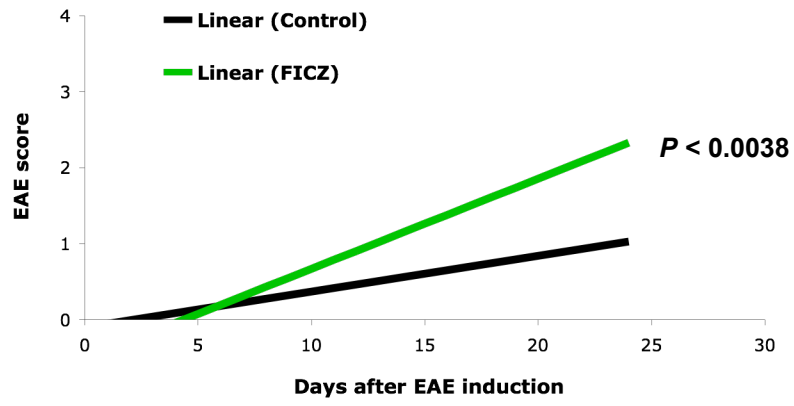

Supplementary Figure 12

## Legends to Supplementary Figures

**Supplementary Figure 1. AHR binding sites in the *foxp3* locus.** (a) Schematic representation of the *foxp3* gene. Arrows indicate location of PCR primers used in ChIP assays, exons are depicted in red, with their number indicated below them. (b) Sequence comparison of FoxP3 genes of zebrafish, human and mouse around the CABS. The stars indicate identity. (c) Sequences corresponding to NCABS-1, -2 and -3. (d) ChIP analysis of the interaction of AHR to the CABS and NCABS in *foxp3* and *cyp1a1* in thymic CD4<sup>+</sup> T cells from TCDD- or control-treated mice.

**Supplementary Figure 2. Effects of AHR modulation on pre-existing T<sub>reg</sub>.** (a) CD4<sup>+</sup> Foxp3:GFP<sup>+</sup> T<sub>reg</sub> were FACS-sorted from naive Foxp3<sup>gfp</sup> mice and the effect of AHR-inactivation with resveratrol on the suppressive activity was assayed using CD4<sup>+</sup> Foxp3:GFP<sup>-</sup> cells activated with antibodies to CD3 as effector T cells in the presence of resveratrol. Cell proliferation is indicated as cpm + s.d. in triplicate wells. (b) CD4<sup>+</sup> Foxp3:GFP<sup>+</sup> T<sub>reg</sub> and CD4<sup>+</sup> Foxp3:GFP<sup>-</sup> T cells were FACS-sorted from naive Foxp3<sup>gfp</sup> mice and the effect of AHR activation with TCDD on the proliferation was studied. Cell proliferation is indicated as cpm + s.d. in triplicate wells. (c) CD4<sup>+</sup> Foxp3:GFP<sup>+</sup> T<sub>reg</sub> were FACS-sorted from naive Foxp3<sup>gfp</sup> mice and the effect of AHR-activation with TCDD on the suppressive activity was assayed using CD4<sup>+</sup> Foxp3:GFP<sup>-</sup> cells activated with antibodies to CD3 as effector T cells in the presence of resveratrol. Cell proliferation is indicated as cpm + s.d. in triplicate wells.

**Supplementary Figure 3. Dose-dependent suppression of EAE by TCDD.** Linear regression analysis of EAE in C57BL/6 mice treated with 1, 0.1 or 0.01 µg/mouse of

TCDD, or with the vehicle corn oil (control).  $P < 0.0001$  when the slope of the TCDD 1  $\mu\text{g}$  group was compared to that of the Control, TCDD 0.1  $\mu\text{g}$  or TCDD 0.01  $\mu\text{g}$  groups.

**Supplementary Figure 4. AHR activation by TCDD inhibits CNS inflammation, demyelination and axonal loss.** Quantification of the cellular infiltrate, demyelination and axonal loss on the spinal cord of TCDD-treated and control mice. Spinal cords were taken on day 19 after EAE induction and stained with hematoxylin & eosin, luxol fast blue or silver stain to quantify the cellular infiltrate (a), demyelination (b) and axonal loss (c), respectively. The effect of TCDD-treatment was analyzed using Student's *t*-test.

**Supplementary Figure 5. Inhibition of EAE by TCDD is mediated by AHR.** Linear regression analysis of EAE in WT and AHR-d mice treated with 1  $\mu\text{g}/\text{mouse}$  of TCDD or corn oil (Control).  $P < 0.0001$  when the slope of the WT TCDD group was compared to that of the WT Control, AHR-d TCDD groups.

**Supplementary Figure 6. Inhibition of EAE by TCDD is mediated by AHR.** (a) Heatmap depicting the antibody response to myelin antigens on day 21 after EAE induction as measured on antigen microarrays. Each column represents a serum sample, color-coded at the bottom to indicate whether it corresponds to a TCDD or control sample. Only significantly down-regulated antibody reactivities are shown ( $n = 10$ , *t*-test FDR  $< 0.05$ ), according to the colorimetric scale on the right. (b) Proliferative response to antibodies to CD3 of lymph node cells taken from TCDD or control treated animals 10 days after immunization with MOG<sub>35-55</sub>/CFA. Cell

proliferation is indicated as cpm + s.d. in triplicate wells. (c) Recall cytokine response to MOG<sub>35-55</sub> of CD4<sup>+</sup>Foxp3:GFP<sup>-</sup> lymph node cells taken from TCDD or control treated Foxp3<sup>gfp</sup> mice 10 days after immunization with MOG<sub>35-55</sub>/CFA. Cytokine secretion is expressed as pg/ml in triplicate wells.

**Supplementary Figure 7. Effect of AHR activation by TCDD on T<sub>reg</sub> depleted mice.**

Foxp3<sup>gfp</sup> mice were treated with an antibody to CD25 (PC61) to deplete T<sub>reg</sub> cells, treated with TCDD (1 µg/mouse) or oil and then EAE was induced with MOG<sub>35-55</sub>/CFA. (a) Foxp3:GFP<sup>+</sup> fraction in the CD4<sup>+</sup> T cell gate in the peripheral blood. Significantly higher levels CD4<sup>+</sup> Foxp3:GFP<sup>+</sup> T<sub>reg</sub> were detected in the TCDD-treated group 7 days after treatment with TCDD ( $P < 0.04$ , Student's *t*-test,  $n = 4-5$ ). (b) Clinical EAE scores. TCDD-treated mice showed a significant delay in the onset of EAE ( $P = 0.03$ , Student's *t*-test,  $n = 9$ ). (c and d) Draining lymph node cells were recovered on day 18, stimulated with PMA/ionomycin and stained for CD4 and intracellular IL-17 and IFN $\gamma$ . The numbers in the quadrants show percentages of cytokine positive cells in the CD4<sup>+</sup>Foxp3:GFP<sup>-</sup> T cell gate. Treatment with TCDD led to a significant decrease in the frequency of CD4<sup>+</sup> IL-17<sup>+</sup> T cells ( $P = 0.03$ , Student's *t*-test,  $n = 4$ ).

**Supplementary Figure 8. Transfer of protection of EAE by TCDD with CD4<sup>+</sup> T cells.** Linear regression analysis of EAE in WT mice transferred with CD4<sup>+</sup> T cells prepared from control (corn oil) treated mice (CD4 Control), or with CD4<sup>+</sup> T cells (CD4 TCDD) or CD4<sup>+</sup>CD25<sup>-</sup> (CD4CD25- TCDD) T cells from TCDD-treated mice.

$P < 0.001$  when the slope of the CD4 TCDD group was compared to that of the CD4 Control or CD4CD25- TCDD groups.

**Supplementary Figure 9. CD4<sup>+</sup>-transferred protection from EAE requires TGFbRII signalling.** Linear regression analysis of EAE in WT mice and DN TGFbeta RII transferred with CD4<sup>+</sup> T cells prepared from TCDD or control (corn oil) treated mice.  $P < 0.001$  when the slope of the CD4 TCDD group was compared to that of the CD4 Control or TCDD DN TGFbetaRII groups.

**Supplementary Figure 10. Augmented EAE in AHR-d mice.** Linear regression analysis of EAE in WT and AHR-d mice (control).  $P < 0.0128$  when the slopes of the AHR-d and WT groups were compared.

**Supplementary Figure 11. Amelioration of EAE by the AHR endogenous ligand ITE.** Linear regression analysis of EAE in mice treated with ITE (100  $\mu\text{g}/\text{mouse}/\text{day}$ ) or vehicle (Control).  $P < 0.0137$  when the slopes of the ITE and Control groups were compared.

**Supplementary Figure 12. Exacerbation of EAE by the AHR endogenous ligand FICZ.** Linear regression analysis of EAE in mice treated with FICZ (1  $\mu\text{g}/\text{mouse}$ ) or vehicle (corn oil).  $P < 0.0038$  when the slopes of the FICZ and Control groups were compared.
